# Supplementary material for: Gender-specific association of oxidative stress and immune response in septic shock mortality using NMR-based metabolomics
Source: Royal Society of Chemistry journal article supplement (doi:10.1039/d1mo00398d), 2021-11-15
Supplement: d1mo00398d1.xlsx [file d1mo00398d1.xlsx]

## Sheet: Sheet1
Pandey et. al(2021) Gender-Specific Association Of Oxidative Stress And Immune Response In Septic Shock Mortality using NMR based metabolomics
Supplementary Table S1 : Binned 1H CPMG NMR spectra of patients used in the study
S.no.	Class	8.9995	8.9985	8.9975	8.9965	8.9955	8.9945	8.9935	8.9925	8.9915	8.9905	8.9895	8.9885	8.9875	8.9865	8.9855	8.9845	8.9835	8.9825	8.9815	8.9805	8.9795	8.9785	8.9775	8.9765	8.9755	8.9745	8.9735	8.9725	8.9715	8.9705	8.9695	8.9685	8.9675	8.9665	8.9655	8.9645	8.9635	8.9625	8.9615	8.9605	8.9595	8.9585	8.9575	8.9565	8.9555	8.9545	8.9535	8.9525
S1	Female Survivors	7.35e-06	7.6e-06	7.98e-06	7.73e-06	9.8e-06	8.49e-06	9.17e-06	6.62e-06	4.89e-06	6.95e-06	6.19e-06	9.89e-06	1.095e-05	1.071e-05	7.84e-06	8.29e-06	6.19e-06	8.12e-06	1.121e-05	1.105e-05	8.61e-06	8.75e-06	8.39e-06	1.018e-05	9.94e-06	8.56e-06	7.83e-06	8.1e-06	7.24e-06	6.96e-06	9e-06	6.31e-06	7.28e-06	7.85e-06	9.52e-06	7.38e-06	8.27e-06	8.94e-06	1.28e-05	6.74e-06	1.005e-05	1.02e-05	7.74e-06	6.28e-06	7.2e-06	8.34e-06	7.92e-06	9e-06
S2	Female Survivors	-1.211e-05	-1.889e-05	-1.273e-05	-1.06e-05	-1.143e-05	-1.529e-05	-1.616e-05	-8.78e-06	-6.58e-06	-1.201e-05	-7.9e-06	-7.81e-06	-1.151e-05	-1.573e-05	-1.369e-05	-9.36e-06	-1.359e-05	-7.49e-06	-1.243e-05	-9.93e-06	-3.05e-06	-7.29e-06	-6.71e-06	-6.3e-06	-1.24e-05	-6.41e-06	-1.163e-05	-7.46e-06	-1.084e-05	-9.28e-06	-1.102e-05	-3.52e-06	-1.09e-05	-1.989e-05	-1.945e-05	-1.897e-05	-1.42e-05	-1.647e-05	-7.55e-06	-7.54e-06	-1.584e-05	-9.46e-06	-1.095e-05	-4.28e-06	-8.19e-06	-1.386e-05	-1.957e-05	-1.619e-05
S3	Female Survivors	-2.14e-06	-1e-08	-5e-07	-8.9e-07	1.87e-06	2.41e-06	1.6e-06	8.7e-07	1.63e-06	2.42e-06	2.28e-06	2.3e-06	1.7e-07	3.5e-06	3.1e-06	4.35e-06	2.24e-06	1.02e-06	4.13e-06	6.17e-06	4.16e-06	4.27e-06	4.97e-06	6.09e-06	5.27e-06	5.4e-06	6.25e-06	3.29e-06	2.64e-06	3.82e-06	4.76e-06	2.47e-06	3.29e-06	4.86e-06	3.94e-06	1.8e-06	1.95e-06	4.09e-06	2.76e-06	5.26e-06	5.67e-06	3.67e-06	3.76e-06	1.2e-07	-1.22e-06	8.5e-07	2.71e-06	5.3e-07
S4	Female Survivors	-3.15e-06	1.6e-07	-1.73e-06	-4.71e-06	-1.4e-07	-8.73e-06	-8.98e-06	-1.7e-06	-5.11e-06	2.7e-07	7.7e-07	-3.28e-06	2.14e-06	-2.57e-06	5.5e-07	-8.12e-06	-3.74e-06	-2.9e-06	3.14e-06	3.6e-06	4.6e-07	3.78e-06	8.6e-06	1.1e-06	2.4e-07	-6.05e-06	-4.25e-06	-7.63e-06	-1.441e-05	-2.77e-06	1e-07	-7.23e-06	-1.58e-06	-7.41e-06	-3.97e-06	2.2e-07	-3.64e-06	-4.4e-06	-6.9e-07	-2.17e-06	-1.035e-05	-7e-06	-8.07e-06	-4.46e-06	9.64e-06	-2.9e-07	-6.31e-06	-1.09e-06
S5	Female Survivors	2.6e-07	-2.12e-06	-1.9e-06	-2.52e-06	-9.8e-07	-3.14e-06	-3.55e-06	-8.6e-07	-1.67e-06	-2.4e-06	3e-08	1.59e-06	1.1e-07	-1.06e-06	-9e-07	-1.57e-06	1.09e-06	1.9e-07	-1.58e-06	1.19e-06	2.26e-06	-6.9e-07	-7e-08	3.27e-06	-1.23e-06	-2.95e-06	3.3e-07	7.2e-07	2.97e-06	1.34e-06	-2e-07	-5e-07	2.64e-06	1.79e-06	3e-07	1.15e-06	1.49e-06	-7.4e-07	-1.05e-06	2.57e-06	3.36e-06	9.9e-07	9.3e-07	1.19e-06	2.93e-06	2.51e-06	7.4e-07	1e-07
S6	Female Survivors	2.99e-06	5.81e-06	2.16e-06	5.58e-06	-1.087e-05	2.53e-06	1.1e-06	0	-1e-06	6.2e-06	3.02e-06	3.05e-06	1.43e-06	4.59e-06	2.085e-05	1.1e-05	1.847e-05	7.75e-06	4.78e-06	9.74e-06	8.33e-06	-1.131e-05	-8.65e-06	3e-07	-4.7e-06	-2.9e-06	-1.384e-05	-1.976e-05	-7.02e-06	3.92e-06	-6.7e-07	1.36e-06	-3.02e-06	7.47e-06	7.39e-06	2.35e-06	9.22e-06	7.13e-06	1.9e-07	-1e-07	-7.93e-06	-9.44e-06	-4.6e-07	-2.56e-06	-1.058e-05	-1.34e-06	5.64e-06	1.4e-06
S7	Female Survivors	4.38e-06	7.13e-06	3.41e-06	3.09e-06	5.37e-06	1.365e-05	1.391e-05	1.265e-05	5.94e-06	-1.83e-06	7.54e-06	1.032e-05	1.252e-05	9.4e-07	4.17e-06	6.46e-06	8.96e-06	9.26e-06	1.004e-05	4.66e-06	1.194e-05	1.371e-05	1.191e-05	1.196e-05	7.74e-06	4.33e-06	7.69e-06	3.24e-06	-9.67e-06	6.53e-06	1.018e-05	1.64e-06	2.08e-06	1.51e-06	7.2e-06	7.65e-06	7.54e-06	6.13e-06	2.65e-06	6.36e-06	1.17e-06	1.17e-05	6.57e-06	4.87e-06	1.131e-05	7.95e-06	1.28e-05	8.39e-06
S8	Female Survivors	-7.1e-07	3.04e-06	4.5e-06	8.2e-06	6.32e-06	-2.68e-06	8.67e-06	8.9e-06	2.03e-06	8.95e-06	9e-08	-2.34e-06	7.18e-06	8.46e-06	2.18e-06	1e-06	3.8e-07	5.49e-06	3.47e-06	3.88e-06	5.45e-06	5.53e-06	-1.29e-06	4.2e-06	1.292e-05	5.31e-06	3.5e-07	8.41e-06	5.34e-06	2.95e-06	-4.07e-06	-3.06e-06	-2.78e-06	3.55e-06	1.13e-06	8.4e-07	5.75e-06	4.8e-06	2.15e-06	1.225e-05	1.138e-05	4.05e-06	-1.99e-06	6.09e-06	6.41e-06	1.14e-05	8.31e-06	3.97e-06
S9	Female Survivors	1.5e-07	4.99e-06	4.52e-06	4.11e-06	2.49e-06	1.63e-06	1.2e-07	1.19e-06	-1.9e-06	1.71e-06	1.08e-06	-1.9e-07	2.23e-06	-2.6e-06	-4.2e-07	-1.55e-06	-6.02e-06	-1.99e-06	-2.61e-06	-2.18e-06	-4.88e-06	-6.7e-06	-3.52e-06	-4.69e-06	-2.04e-06	-3.57e-06	-2.9e-06	-5.58e-06	-2.47e-06	-1.58e-06	-4.1e-07	-2.77e-06	1.66e-06	-2.49e-06	-1.4e-07	-4.7e-07	2.45e-06	5.8e-07	-1.18e-06	-1.18e-06	2.33e-06	2.88e-06	-4.83e-06	6.6e-07	4.11e-06	6.14e-06	3.33e-06	3.9e-07
S10	Female Survivors	1.02e-05	-1.138e-05	1.979e-05	5.018e-05	0.00011443	7.526e-05	1.514e-05	-1.044e-05	-3.959e-05	3.087e-05	1.542e-05	-3.254e-05	-3.689e-05	-3.69e-06	2.81e-06	6.29e-06	1.694e-05	1.459e-05	2.55e-06	-4.085e-05	1.305e-05	1.4e-06	-1.544e-05	1.303e-05	3.316e-05	2.873e-05	1.172e-05	7.18e-06	7.62e-06	1.098e-05	8.59e-06	-3.17e-05	1.93e-05	3.38e-05	5.623e-05	9.9e-07	3.266e-05	3.945e-05	2.976e-05	3.798e-05	1.107e-05	1.57e-06	-1.164e-05	1.477e-05	-1.402e-05	-1.195e-05	1.918e-05	2.21e-05
S11	Female Survivors	5.6e-06	1.31e-06	-4.45e-06	-5e-07	-3e-08	-2.32e-06	-4e-08	-4.29e-06	-3.45e-06	2.57e-06	1.34e-06	2.29e-06	2.2e-07	1.1e-07	-3e-08	-3e-07	-1.41e-06	-2.4e-06	-4.6e-07	1.48e-06	-1.8e-07	7.7e-07	1.7e-07	-2.8e-07	1.9e-07	-1.34e-06	-2.35e-06	7.4e-07	3.68e-06	1.6e-06	5.7e-07	1.29e-06	3.05e-06	-2.5e-07	3.7e-07	4.7e-07	7.1e-07	1.5e-06	-1.52e-06	1.2e-06	4.41e-06	5.26e-06	6.14e-06	3.33e-06	3.33e-06	4.77e-06	3.3e-06	3.9e-07
S12	Female Survivors	-4.51e-06	-4.01e-06	-3.6e-06	-5.41e-06	-4.87e-06	-7.03e-06	-6.31e-06	-2.69e-06	-8.5e-07	-4.02e-06	-4.78e-06	-4.5e-06	-4.88e-06	-4.03e-06	-4.44e-06	-3.98e-06	-3.9e-06	-4.15e-06	-5.58e-06	-5.92e-06	-4.53e-06	-3.97e-06	-4e-06	-3.94e-06	-4.8e-06	-6.42e-06	-5.24e-06	-5.36e-06	-6.06e-06	-6.96e-06	-6.31e-06	-4.32e-06	-2.89e-06	-4.75e-06	-6.6e-06	-5.82e-06	-4.95e-06	-7.74e-06	-6.36e-06	-4.16e-06	-3.95e-06	-4.66e-06	-5.72e-06	-5.16e-06	-5.79e-06	-4.6e-06	-4.47e-06	-4.02e-06
S13	Male Survivors	7.95e-06	7.07e-06	3.43e-06	1.28e-06	9.12e-06	3.64e-06	-1.6e-07	6.44e-06	1.009e-05	5.06e-06	6.99e-06	8.65e-06	8.12e-06	5.54e-06	2.53e-06	6.1e-06	9.68e-06	7.18e-06	6.7e-06	9.72e-06	6.04e-06	3.69e-06	4.85e-06	1.01e-06	-2.54e-06	3.1e-07	2.68e-06	7.46e-06	6.56e-06	9.5e-07	1.27e-06	7.24e-06	1.96e-06	7.36e-06	-1.15e-06	-1.35e-06	3.36e-06	6.94e-06	4.16e-06	-2.59e-06	1.39e-06	1.7e-07	7.54e-06	9.49e-06	7.07e-06	3.03e-06	2.27e-06	5.55e-06
S14	Male Survivors	3.92e-06	3.96e-06	1.54e-06	4.92e-06	1.83e-06	8e-07	8.9e-07	5.01e-06	7.21e-06	8e-07	-1.1e-07	3.7e-06	5.03e-06	7.71e-06	6.84e-06	-8.2e-07	3.1e-07	6.79e-06	5.95e-06	6.73e-06	-1.59e-06	7.12e-06	5.12e-06	1.88e-06	4.33e-06	5.59e-06	5.38e-06	1.1e-07	-3.11e-06	-1.24e-06	3.89e-06	2.82e-06	3.91e-06	4.07e-06	6.27e-06	7.43e-06	4.95e-06	7.54e-06	6.93e-06	8.89e-06	5e-07	-9.8e-07	-3.79e-06	-2.8e-06	3.27e-06	3.83e-06	3.32e-06	1.013e-05
S15	Male Survivors	2.63e-06	-3.17e-06	2.36e-06	4.41e-06	-5.6e-07	-3.56e-06	3.08e-06	7.12e-06	4.81e-06	6.61e-06	9.15e-06	7.06e-06	5.56e-06	7.34e-06	1.94e-06	5.83e-06	6.57e-06	4.62e-06	4.57e-06	6.95e-06	2.74e-06	6.05e-06	3.42e-06	9.74e-06	1.237e-05	5.28e-06	2.96e-06	3.83e-06	3.78e-06	2.57e-06	6.94e-06	6.22e-06	2.33e-06	4.75e-06	6.38e-06	8.1e-06	6.95e-06	6.82e-06	4.62e-06	3.53e-06	8.63e-06	7.44e-06	-1.43e-06	6.01e-06	7.96e-06	3.5e-06	7.87e-06	5.69e-06
S16	Male Survivors	-5.6e-06	1.41e-06	-6.77e-06	-3.59e-06	-1.4e-07	1.65e-06	1.49e-06	9.2e-06	-2.1e-07	-4.56e-06	-2.05e-06	8.5e-07	3.12e-06	7.44e-06	2.73e-06	-6.37e-06	-9.29e-06	-3.17e-06	-4.29e-06	-1.053e-05	-6.5e-06	-4.53e-06	-6.81e-06	-2.05e-06	-9.2e-06	-2.75e-06	-4e-06	-1.48e-06	-1.03e-06	-1.94e-06	-3.05e-06	-8.61e-06	-1.282e-05	-8.4e-07	3.19e-06	-1.11e-06	-8e-07	1.09e-06	-5.04e-06	-5.06e-06	-1.9e-07	-6.34e-06	-2.83e-06	4.97e-06	-2.68e-06	5.48e-06	-4.44e-06	-4.31e-06
S17	Male Survivors	4.91e-06	8.51e-06	1.085e-05	-3e-08	2.55e-06	6.17e-06	6.14e-06	3.39e-06	4.09e-06	1.266e-05	4.62e-06	3.69e-06	1.02e-05	4.55e-06	6.04e-06	7.55e-06	3.87e-06	7.2e-06	8.11e-06	5.13e-06	5.18e-06	9.34e-06	6.48e-06	5.42e-06	3.74e-06	1.109e-05	9.08e-06	9.32e-06	6.77e-06	1.586e-05	8.33e-06	2.8e-07	3.21e-06	9.92e-06	7.03e-06	8.23e-06	7.2e-06	9.18e-06	5.84e-06	2.74e-06	5.26e-06	5.66e-06	1.036e-05	8.3e-06	9.02e-06	4.56e-06	9e-07	6.1e-07
S18	Male Survivors	1.308e-05	1.267e-05	4.08e-06	5.41e-06	9.98e-06	5.57e-06	-3.23e-06	4.58e-06	1.143e-05	8.96e-06	6.5e-06	7.56e-06	3.64e-06	8.13e-06	7.9e-06	5e-08	5.67e-06	1.007e-05	1.066e-05	6.81e-06	1.04e-06	7.3e-06	1.148e-05	1.086e-05	8.97e-06	8.08e-06	4.07e-06	4.26e-06	5.82e-06	4.03e-06	1.058e-05	2.44e-06	5.25e-06	7.01e-06	5.93e-06	1.093e-05	1.018e-05	1.102e-05	8.3e-06	9.43e-06	1.269e-05	1.547e-05	8.03e-06	7.54e-06	2.49e-06	4.73e-06	1.343e-05	1.518e-05
S19	Male Survivors	4.7e-06	1.5e-07	1.07e-06	-4.4e-07	7.15e-06	8.33e-06	-2.41e-06	-5.99e-06	-5.57e-06	-9.03e-06	-7.92e-06	2.38e-06	2.13e-06	3.8e-06	2.47e-06	3.3e-07	3.86e-06	6.4e-07	3.34e-06	-9.9e-07	-9.6e-07	6.54e-06	3.58e-06	4.79e-06	1.004e-05	5.51e-06	1.59e-06	-2.06e-06	0	8.3e-07	1.51e-06	-1.5e-07	-9.3e-07	-2.71e-06	1.63e-06	4.7e-06	8.01e-06	3.45e-06	-1.2e-07	1.93e-06	6.32e-06	1.75e-06	1.75e-06	-2.29e-06	6.42e-06	4.65e-06	5.45e-06	6.6e-06
S20	Male Survivors	2.87e-06	2.26e-06	6.2e-07	2.23e-06	3.77e-06	1.25e-06	2.15e-06	1.02e-06	2.06e-06	2.82e-06	3.12e-06	3e-08	1.99e-06	4.52e-06	5.05e-06	4.21e-06	5.73e-06	5.41e-06	3.7e-06	2.25e-06	2.71e-06	4.48e-06	3.57e-06	3.93e-06	3.32e-06	1.29e-06	2.72e-06	1.58e-06	1.11e-06	4.87e-06	6.45e-06	3.72e-06	2.16e-06	3.5e-06	4.88e-06	4.51e-06	9.6e-07	3.86e-06	3.18e-06	3.58e-06	2.04e-06	0	7e-08	-9.8e-07	5.67e-06	3.51e-06	2.71e-06	2.73e-06
S21	Male Survivors	-1.188e-05	-1.263e-05	-1.255e-05	-1.613e-05	-1.487e-05	-1.259e-05	-9.97e-06	-8.02e-06	-9.21e-06	-1.015e-05	-1.223e-05	-1.341e-05	-1.467e-05	-9.89e-06	-1.047e-05	-1.082e-05	-1.122e-05	-1.615e-05	-1.218e-05	-8.95e-06	-1.175e-05	-1.161e-05	-1.511e-05	-1.698e-05	-1.205e-05	-1.539e-05	-1.247e-05	-1.161e-05	-1.078e-05	-1.232e-05	-1.556e-05	-1.646e-05	-1.201e-05	-1.252e-05	-1.052e-05	-8.7e-06	-6.6e-06	-1.076e-05	-1.027e-05	-1.254e-05	-1.161e-05	-1.118e-05	-8.63e-06	-6.23e-06	-7.56e-06	-1.268e-05	-1.774e-05	-1.015e-05
S22	Male Survivors	-5.45e-06	-1.009e-05	-1.187e-05	-8.92e-06	-8.08e-06	-6.52e-06	-7.91e-06	-9.4e-06	-6.84e-06	-1.244e-05	-1.058e-05	-8.55e-06	-1.145e-05	-9.98e-06	-7.53e-06	-5.85e-06	-5.17e-06	-3.86e-06	-2.66e-06	-5.5e-06	-7.98e-06	-7.99e-06	-4.14e-06	-2.91e-06	-1.98e-06	-6.98e-06	-6.35e-06	-5.91e-06	-5.17e-06	-7.75e-06	-8.64e-06	-9.04e-06	-7.61e-06	-7.12e-06	-4.94e-06	-4.73e-06	-4.72e-06	-7.53e-06	-6.63e-06	-7.2e-06	-7.3e-06	-7.21e-06	-9.01e-06	-6.54e-06	-5.83e-06	-4.26e-06	-4.28e-06	-3.37e-06
S23	Male Survivors	2.53e-06	4.83e-06	8.7e-07	1.34e-06	-3.13e-06	-5.01e-06	-6.87e-06	-4.83e-06	1.05e-06	1.04e-06	-4.5e-07	-4.26e-06	-6.51e-06	-4.81e-06	-2.84e-06	2.58e-06	-3.36e-06	-3.65e-06	-2.57e-06	-1.57e-06	-1.5e-06	3.3e-07	6.1e-07	-3.88e-06	-5.24e-06	-7.27e-06	-5.64e-06	-2.39e-06	-1.26e-06	-3.67e-06	-3.55e-06	-1.36e-06	-2e-07	-5.79e-06	-4.5e-07	2.72e-06	2.57e-06	-1.34e-06	-2.98e-06	-2.88e-06	1.27e-06	9.9e-07	2.97e-06	9.1e-07	8.3e-07	-1.75e-06	-2.13e-06	-3.4e-06
S24	Female Non survivors	5.79e-06	1.109e-05	2.08e-06	1.101e-05	1.444e-05	9.22e-06	3.44e-06	2.95e-06	5.72e-06	4.09e-06	5.79e-06	1.254e-05	7.05e-06	7.6e-06	6.65e-06	1.2e-06	5.84e-06	8.17e-06	5.43e-06	6.29e-06	3.77e-06	5.22e-06	1.1e-06	5.4e-07	2.72e-06	4.96e-06	5.68e-06	8.21e-06	9.18e-06	5.18e-06	6.05e-06	6e-06	5.73e-06	2.42e-06	7.44e-06	2.84e-06	4.39e-06	8.04e-06	2.42e-06	6.39e-06	5.51e-06	2.88e-06	3.53e-06	6.9e-06	1.295e-05	7.82e-06	8.53e-06	6.08e-06
S25	Female Non survivors	4.1e-06	4.17e-06	3.79e-06	5.96e-06	2.44e-06	6.87e-06	6.73e-06	5.27e-06	3.88e-06	9.36e-06	7.7e-06	6.75e-06	7.71e-06	5.83e-06	6.03e-06	5.13e-06	6.53e-06	8.49e-06	3.19e-06	2.39e-06	6.79e-06	4.54e-06	5.56e-06	4.63e-06	3.32e-06	8.5e-07	4.28e-06	5.59e-06	7.89e-06	6.75e-06	7.36e-06	2.64e-06	2.28e-06	4.91e-06	6.71e-06	8.12e-06	3.24e-06	2.18e-06	6.83e-06	2.99e-06	1.76e-06	6.53e-06	5.78e-06	2.78e-06	2.76e-06	3.07e-06	2.1e-06	5.18e-06
S26	Female Non survivors	6.8e-07	9.52e-06	5.22e-06	8.71e-06	6.21e-06	1.213e-05	8.35e-06	7.13e-06	4.18e-06	2.86e-06	4.13e-06	3.41e-06	3.18e-06	2.62e-06	6.81e-06	3.45e-06	-3.79e-06	-2.04e-06	3.64e-06	4.44e-06	6.92e-06	1.033e-05	7.05e-06	7.85e-06	7.81e-06	8.2e-06	5.26e-06	6.61e-06	9.36e-06	6.59e-06	4.88e-06	6.77e-06	6.64e-06	2.61e-06	3.3e-06	7.24e-06	8.87e-06	5.67e-06	7.49e-06	1.88e-06	5e-07	2.21e-06	3.33e-06	3.12e-06	2.43e-06	5.28e-06	4.96e-06	4.81e-06
S27	Female Non survivors	1.053e-05	1.044e-05	1.143e-05	1.044e-05	1.009e-05	1.034e-05	8.81e-06	8.95e-06	8.98e-06	1.122e-05	1.185e-05	9.43e-06	1.005e-05	9.9e-06	1.23e-05	1.123e-05	1.051e-05	1.123e-05	1.064e-05	1.111e-05	1.22e-05	1.142e-05	1.032e-05	8.37e-06	1.028e-05	1.297e-05	1.335e-05	1.112e-05	1.108e-05	1.163e-05	1.017e-05	1.076e-05	1.035e-05	1.181e-05	1.012e-05	9.48e-06	9.87e-06	1.022e-05	9.46e-06	1.222e-05	1.231e-05	1.253e-05	1.233e-05	1.247e-05	1.19e-05	1.056e-05	1.156e-05	1.106e-05
S28	Female Non survivors	1.024e-05	1.125e-05	1.122e-05	8.87e-06	4.64e-06	8.38e-06	8.92e-06	1.179e-05	1.378e-05	1.391e-05	9.61e-06	8.11e-06	1.468e-05	1.202e-05	4.99e-06	3.14e-06	1.94e-06	8.27e-06	7.64e-06	1.113e-05	1.403e-05	1.108e-05	8.18e-06	5.36e-06	5.29e-06	6.32e-06	6.66e-06	6.01e-06	6.25e-06	4.78e-06	5.95e-06	9.96e-06	1.297e-05	7.04e-06	1.148e-05	4.13e-06	4.62e-06	1.141e-05	4.49e-06	8.4e-06	5.85e-06	2.23e-06	1.167e-05	1.586e-05	7.11e-06	8.21e-06	9.17e-06	7.76e-06
S29	Female Non survivors	1.31e-06	3.53e-06	8.82e-06	3.77e-06	4.42e-06	4.89e-06	5.01e-06	7.03e-06	3.5e-06	3.33e-06	5.72e-06	4.89e-06	5.42e-06	2.39e-06	1.007e-05	9.99e-06	4e-06	8.39e-06	2.52e-06	3.26e-06	6.28e-06	4.43e-06	-1.04e-06	9.5e-07	5.05e-06	5.59e-06	1.1e-07	4.12e-06	5.45e-06	8.2e-06	8.4e-06	6.32e-06	-3.36e-06	8.2e-07	1.01e-06	2.51e-06	5.17e-06	1.74e-06	5.84e-06	2.75e-06	1.08e-06	6.89e-06	6.05e-06	3.61e-06	1.46e-06	2.63e-06	6.59e-06	5.03e-06
S30	Female Non survivors	1.59e-06	1.097e-05	3.53e-06	6.95e-06	7.47e-06	-2.45e-06	-5.58e-06	-1.53e-06	6e-07	-1.22e-06	-1.2e-07	1.62e-06	1.073e-05	8.37e-06	3.73e-06	9.1e-07	3.39e-06	7.92e-06	5.97e-06	3.51e-06	1.195e-05	4.13e-06	-5.41e-06	-3.39e-06	3.75e-06	6.4e-06	-2.17e-06	8.2e-07	4.1e-06	6.51e-06	9.42e-06	4.87e-06	4.34e-06	7.01e-06	1e-05	1.07e-05	3.34e-06	-5.4e-07	2.31e-06	5.31e-06	3.97e-06	7.13e-06	5.29e-06	5.46e-06	6.85e-06	2.52e-06	-9.42e-06	-3.16e-06
S31	Female Non survivors	1.291e-05	1.432e-05	7.88e-06	9.04e-06	6.94e-06	7.6e-06	7.78e-06	9.08e-06	9.62e-06	8.25e-06	9.48e-06	9.34e-06	6.4e-06	1.284e-05	1.246e-05	7.07e-06	9.76e-06	7.9e-06	6.86e-06	6.39e-06	9.6e-06	7.31e-06	7.24e-06	8.19e-06	3.36e-06	5.26e-06	1.118e-05	1.343e-05	9.06e-06	1.06e-05	1.463e-05	1.073e-05	1.4e-05	8.47e-06	9.47e-06	1.094e-05	6.93e-06	1.141e-05	7.68e-06	9.37e-06	1.374e-05	1.441e-05	8.87e-06	3.84e-06	1.023e-05	7.71e-06	1.41e-06	1.342e-05
S32	Female Non survivors	6.19e-06	6.82e-06	1.538e-05	7.51e-06	6.97e-06	5.4e-06	2.6e-06	7.04e-06	1.073e-05	7.08e-06	7.09e-06	7.03e-06	2.37e-06	-1.7e-06	2.33e-06	1.31e-06	7.62e-06	9.85e-06	8.89e-06	1.089e-05	7.09e-06	3.19e-06	4.11e-06	6.36e-06	2.05e-06	1.98e-06	3.19e-06	-1.23e-06	6.38e-06	7.93e-06	4.62e-06	1e-08	9.43e-06	1.107e-05	-3.73e-06	-3.8e-07	1.52e-06	6.07e-06	5.43e-06	1.032e-05	6.46e-06	7.13e-06	9.11e-06	5.76e-06	6.35e-06	6.17e-06	7.1e-06	1.034e-05
S33	Female Non survivors	-5.61e-06	-4.29e-06	-4.1e-07	-1.19e-06	-2.51e-06	-6e-07	1.66e-06	-9.5e-07	-3.15e-06	-1.8e-06	-3.3e-06	-1.34e-06	-2.09e-06	-5.23e-06	-4.45e-06	-1.85e-06	2.9e-07	2.65e-06	-3.94e-06	-3.12e-06	-1.06e-06	-7e-07	-2.51e-06	-4.02e-06	-2.48e-06	-3.34e-06	-6.57e-06	-1.54e-06	8.6e-07	-3.05e-06	-4.1e-07	-2.73e-06	-3.06e-06	-3.22e-06	-3.58e-06	-4.03e-06	-4.02e-06	-7.3e-07	-5.21e-06	-5.24e-06	-6.9e-07	-2.33e-06	-2.25e-06	-3.92e-06	-4.1e-07	1.23e-06	7e-08	-1.67e-06
S34	Female Non survivors	-3.984e-05	-4.162e-05	-4.222e-05	-4.289e-05	-4.184e-05	-4.247e-05	-4.394e-05	-4.229e-05	-4.213e-05	-4.314e-05	-4.455e-05	-4.46e-05	-4.283e-05	-4.218e-05	-4.357e-05	-4.212e-05	-4.041e-05	-4.293e-05	-4.143e-05	-3.99e-05	-4.05e-05	-4.26e-05	-4.481e-05	-4.213e-05	-4.099e-05	-4.165e-05	-4.347e-05	-4.379e-05	-4.249e-05	-4.095e-05	-4.164e-05	-4.248e-05	-4.252e-05	-4.027e-05	-4.104e-05	-4.192e-05	-3.968e-05	-4.039e-05	-4.158e-05	-4.244e-05	-4.301e-05	-4.202e-05	-4.284e-05	-4.071e-05	-4.314e-05	-4.396e-05	-4.238e-05	-3.987e-05
S35	Female Non survivors	-4.14e-06	-4.52e-06	-6e-06	-6.9e-06	-7.23e-06	-8.1e-06	-6.78e-06	-4.3e-06	-5.19e-06	-5.2e-06	-5.94e-06	-6.2e-06	-2.7e-06	-4.77e-06	-3.55e-06	-2.27e-06	-4.76e-06	-2.85e-06	-6.12e-06	-5.43e-06	-7.39e-06	-4.31e-06	-4.86e-06	-7.61e-06	-5.11e-06	-6.45e-06	-4.54e-06	-2.6e-06	-5.4e-06	-7.02e-06	-1.054e-05	-8.21e-06	-7.13e-06	-7.32e-06	-8.06e-06	-3.89e-06	-3.9e-06	-5.62e-06	-3.87e-06	-4.65e-06	-6.5e-06	-2.93e-06	-6.5e-06	-3.26e-06	-2.17e-06	-3.52e-06	-4e-07	-4.8e-06
S36	Female Non survivors	4.49e-06	-1.08e-06	1.9e-07	2.6e-07	-1.19e-06	2.1e-06	1.31e-06	-2.91e-06	-1.5e-06	3.43e-06	1.23e-06	-2.1e-06	-4.15e-06	-4.27e-06	-3.22e-06	-2.19e-06	-3.66e-06	-4.78e-06	-5.26e-06	-5.4e-07	-2.39e-06	-5.88e-06	-5.73e-06	-6.37e-06	-2.85e-06	-1.57e-06	-5.02e-06	-1.12e-06	1.68e-06	3.79e-06	-2.7e-07	-2.97e-06	-3.48e-06	1.63e-06	1.39e-06	-3.97e-06	-7.1e-07	6.1e-07	-2.57e-06	-2.35e-06	-1.51e-06	-2.26e-06	-5e-07	-3.2e-06	-8.02e-06	-4.99e-06	-3.39e-06	1.3e-06
S37	Female Non survivors	-7.14e-06	-8.72e-06	-5.94e-06	-7.21e-06	-2.43e-06	-7.2e-06	-8.52e-06	-4.74e-06	-5.28e-06	-4.49e-06	-5.75e-06	-6.85e-06	-4.25e-06	-5.34e-06	-5.66e-06	-9.91e-06	-9.29e-06	-6.79e-06	-7.41e-06	-6.01e-06	-1.038e-05	-4.09e-06	-4.83e-06	-5.24e-06	-6.08e-06	-8.25e-06	-1.44e-06	-4.67e-06	-5.78e-06	-8.44e-06	-7.26e-06	-5.18e-06	-4.61e-06	-2.92e-06	-4.04e-06	-4.44e-06	-5.86e-06	-5.85e-06	-5.86e-06	-6.41e-06	-6.04e-06	-3.86e-06	-4.83e-06	-6.5e-06	-6.42e-06	-5.67e-06	-4.55e-06	-8.5e-06
S38	Male Nonsurvivors	5.6e-06	4.54e-06	1.41e-06	4.6e-07	5.1e-07	1.95e-06	4.67e-06	2.58e-06	3.36e-06	2.88e-06	1.61e-06	7.3e-07	5.6e-07	-2e-07	-1.05e-06	3e-07	2.5e-07	1.69e-06	-6.8e-07	1.9e-06	1.75e-06	1.17e-06	7.9e-07	2.18e-06	3.51e-06	9e-07	4.59e-06	6.87e-06	6.82e-06	4.31e-06	2.89e-06	2.81e-06	3.34e-06	5.35e-06	1.24e-06	1.72e-06	2.33e-06	3.6e-06	4.74e-06	5.61e-06	7.59e-06	3.76e-06	1.24e-06	3.57e-06	4.51e-06	3.62e-06	4.52e-06	3.82e-06
S39	Male Nonsurvivors	5.33e-06	2.11e-06	8.35e-06	9.74e-06	5.74e-06	7.25e-06	5.05e-06	8.39e-06	1.168e-05	1.086e-05	1.276e-05	1.329e-05	2.47e-06	1.35e-06	1.21e-06	4.68e-06	5.31e-06	9.87e-06	4.82e-06	3.49e-06	9.76e-06	9.38e-06	1.723e-05	1.388e-05	9.05e-06	7.39e-06	6.07e-06	2.57e-06	7.73e-06	6.87e-06	2.09e-06	3.09e-06	9.09e-06	7.15e-06	7.05e-06	5.32e-06	8.62e-06	1.104e-05	1.437e-05	1.375e-05	5.99e-06	4.64e-06	5.6e-06	1.672e-05	1.188e-05	2.66e-06	-1.53e-06	4.7e-06
S40	Male Nonsurvivors	-8.9e-07	-1.8e-06	4.16e-06	4.22e-06	3.88e-06	6.42e-06	6.87e-06	4.94e-06	3.86e-06	4.13e-06	3.28e-06	2.74e-06	7.97e-06	7.08e-06	7.56e-06	4.51e-06	3.21e-06	1.69e-06	5e-06	2.93e-06	5.5e-07	6.9e-07	1.32e-06	2.96e-06	2.01e-06	5.33e-06	7.35e-06	3.61e-06	5.84e-06	5.19e-06	2.71e-06	2.33e-06	9.6e-07	3.61e-06	2.17e-06	5.63e-06	7.43e-06	6.46e-06	5.86e-06	9.8e-07	8.1e-07	3.18e-06	2.65e-06	-7.5e-07	7.1e-07	8.4e-07	4.26e-06	3.23e-06
S41	Male Nonsurvivors	1.26e-06	1.18e-06	2.82e-06	2.75e-06	4.7e-07	-1.22e-06	2.2e-07	2.91e-06	2.5e-06	4.92e-06	3.41e-06	4.8e-07	3.36e-06	-7.5e-07	1.76e-06	3.26e-06	4.59e-06	3.78e-06	2.09e-06	5.07e-06	3.63e-06	2.09e-06	3.07e-06	9.9e-07	1.65e-06	2.22e-06	3.47e-06	5.2e-06	4.9e-07	1.48e-06	1.54e-06	8.1e-07	5.5e-07	-6.8e-07	2.67e-06	1.14e-06	2.8e-06	5.43e-06	6.9e-07	9.8e-07	3e-08	8.8e-07	3.49e-06	2.22e-06	1.88e-06	2.55e-06	3.43e-06	1.7e-06
S42	Male Nonsurvivors	4.86e-06	3.73e-06	4.64e-06	1.13e-06	6.9e-07	2.27e-06	2.78e-06	4.22e-06	5.48e-06	5.18e-06	2.71e-06	4.69e-06	3.75e-06	1.54e-06	3.2e-07	-5.5e-07	2.55e-06	4.68e-06	4.46e-06	3.06e-06	1.01e-06	5.54e-06	6e-06	3.46e-06	3.16e-06	4.77e-06	3.32e-06	3.66e-06	8.5e-07	-8e-08	3.63e-06	5.39e-06	-5.2e-07	-8.7e-07	3.43e-06	3.5e-06	1.19e-06	1.76e-06	5.9e-07	-1.03e-06	-2.56e-06	1.65e-06	2.49e-06	1.91e-06	4.56e-06	3.08e-06	5.07e-06	4.22e-06
S43	Male Nonsurvivors	4.9e-06	9.28e-06	1.287e-05	2.15e-06	9.14e-06	7.04e-06	1.7e-06	6.76e-06	5.59e-06	3.53e-06	3.69e-06	9.71e-06	4.33e-06	8.09e-06	5.39e-06	1.89e-06	8.79e-06	1.315e-05	1.234e-05	1.64e-06	4.53e-06	1.43e-06	8.21e-06	7.7e-06	9.17e-06	1.032e-05	7.62e-06	7.89e-06	8.06e-06	5.71e-06	4.52e-06	9.9e-06	6.29e-06	3.71e-06	7.16e-06	5.46e-06	5.52e-06	2.74e-06	9.53e-06	1.396e-05	9.68e-06	9.33e-06	9.89e-06	4.98e-06	1.048e-05	1.147e-05	1.175e-05	5.29e-06
S44	Male Nonsurvivors	-1.93e-06	4.4e-07	-6.68e-06	-4.07e-06	-4.02e-06	-4.17e-06	-2.17e-06	-4.6e-07	-7.1e-06	3.34e-06	6.53e-06	8.21e-06	2.59e-06	5.39e-06	8.99e-06	3.94e-06	5e-06	8.15e-06	9.63e-06	5.8e-07	-2.1e-07	4.04e-06	3.81e-06	2.4e-07	-1.46e-06	6.16e-06	6.2e-06	-1.04e-06	1.37e-06	1.13e-06	-8.1e-07	9.84e-06	1.045e-05	5.73e-06	6.38e-06	6.47e-06	2.02e-06	-7.2e-07	2.57e-06	3.55e-06	-1.15e-06	-2.01e-06	2.23e-06	4.3e-07	1.79e-06	2.27e-06	7.56e-06	4.16e-06
S45	Male Nonsurvivors	3.5e-06	3.59e-06	3.8e-06	1.13e-06	3.77e-06	-9.8e-07	7.4e-07	6.68e-06	7.18e-06	2.48e-06	1.27e-06	-1.15e-06	4.11e-06	5.48e-06	4.76e-06	-5.94e-06	6.21e-06	5.66e-06	-7e-08	-7.8e-07	-5.2e-07	-2.06e-06	-2.32e-06	-1.05e-06	-7.5e-07	-7.28e-06	-3.17e-06	2.93e-06	2.34e-06	-2.05e-06	6.38e-06	7.64e-06	-4.01e-06	-2.07e-06	4.9e-07	7.98e-06	5.1e-06	6.58e-06	-3.4e-07	-4.72e-06	-1.26e-06	-2.3e-07	1.4e-07	4.19e-06	1.87e-06	7.5e-06	8.14e-06	-2.8e-06
S46	Male Nonsurvivors	-9.93e-06	-9.23e-06	-8.93e-06	-8.6e-06	-6.78e-06	-5.84e-06	-9.29e-06	-6.52e-06	-7.94e-06	-6.63e-06	-6.36e-06	-5.78e-06	-1.72e-06	-3.94e-06	-7.74e-06	-5.78e-06	-6.18e-06	-6.68e-06	-7.55e-06	-5.95e-06	-1.022e-05	-8.99e-06	-9.64e-06	-8.97e-06	-8.63e-06	-5.55e-06	-7.32e-06	-8.9e-06	-5.78e-06	-8.93e-06	-8.6e-06	-7.84e-06	-8e-06	-8.37e-06	-7.17e-06	-6.93e-06	-7.62e-06	-7.48e-06	-1.38e-06	-5.6e-06	-6.93e-06	-4.64e-06	-8.39e-06	-1.15e-05	-9.35e-06	-7.13e-06	-7.49e-06	-8.72e-06
S47	Male Nonsurvivors	-1.198e-05	-8.73e-06	-6.22e-06	-1.184e-05	-1.02e-05	-1.528e-05	-1.172e-05	-7.13e-06	-1.189e-05	-1.032e-05	-9.77e-06	-1.001e-05	-8.15e-06	-1.45e-05	-1.049e-05	-1.159e-05	-1.047e-05	-9.16e-06	-4.87e-06	-6.74e-06	-9.19e-06	-1.406e-05	-1.691e-05	-1.335e-05	-1.171e-05	-7.91e-06	-8.77e-06	-1.108e-05	-1.46e-05	-1.393e-05	-1.764e-05	-1.216e-05	-8.64e-06	-1.342e-05	-1.59e-05	-9.15e-06	-6.32e-06	-5.45e-06	-4.78e-06	-3.04e-06	-8.89e-06	-1.026e-05	-1.473e-05	-1.087e-05	-1.148e-05	-7.61e-06	-1.545e-05	-1.433e-05
S48	Male Nonsurvivors	-9.87e-06	-8.24e-06	-9.87e-06	-1.078e-05	-1.218e-05	-8.41e-06	-6.51e-06	-7.46e-06	-6.79e-06	-1.137e-05	-1.075e-05	-8.5e-06	-1.103e-05	-6.6e-06	-9.09e-06	-1.113e-05	-8.5e-06	-7.31e-06	-1e-05	-1.037e-05	-9.12e-06	-9.87e-06	-9.54e-06	-7.48e-06	-1.052e-05	-1.249e-05	-9.46e-06	-9.48e-06	-7.95e-06	-9.39e-06	-1.237e-05	-1.163e-05	-8.13e-06	-9.11e-06	-1.02e-05	-1.382e-05	-9.97e-06	-1.218e-05	-1.112e-05	-1.16e-05	-1.243e-05	-8.82e-06	-1.186e-05	-9.46e-06	-1.142e-05	-1.292e-05	-9.95e-06	-1.171e-05
S49	Male Nonsurvivors	-2.7e-06	-5.14e-06	-7.3e-06	-6.31e-06	-5.1e-07	-1.15e-06	1.28e-06	3.5e-07	-5e-07	-2e-06	-3.88e-06	-7.7e-07	-1.5e-07	7.4e-07	-2.47e-06	-1.99e-06	-1.37e-06	-1.5e-07	-4.05e-06	-3.11e-06	-3.36e-06	-4.12e-06	1.08e-06	4.98e-06	2.37e-06	-4.2e-07	-1.14e-06	-1.6e-07	-1.08e-06	5.6e-07	-1.68e-06	-5.31e-06	-6.03e-06	-3.03e-06	-2.3e-06	-4.53e-06	-2.31e-06	-8.7e-07	-6.9e-06	-3.23e-06	-1.9e-06	-8.5e-07	-2.2e-06	3.6e-07	1.77e-06	1.13e-06	-1.64e-06	-1.4e-06
S50	Male Nonsurvivors	-1.267e-05	-1.208e-05	-1.078e-05	-1.36e-05	-1.538e-05	-1.484e-05	-1.198e-05	-1.224e-05	-1.314e-05	-1.241e-05	-1.443e-05	-1.08e-05	-1.018e-05	-9.09e-06	-1.225e-05	-1.197e-05	-1.413e-05	-1.432e-05	-1.405e-05	-1.826e-05	-1.723e-05	-1.048e-05	-1.203e-05	-1.176e-05	-1.035e-05	-1.168e-05	-1.249e-05	-1.195e-05	-1.454e-05	-1.065e-05	-1.208e-05	-1.111e-05	-1.193e-05	-1.17e-05	-1.324e-05	-1.108e-05	-1.093e-05	-1.187e-05	-1.031e-05	-9.16e-06	-7.95e-06	-7.09e-06	-8.12e-06	-9.31e-06	-9.66e-06	-1.214e-05	-1.293e-05	-1.24e-05
[truncated: 5,000 more columns]
