# Supplementary material for: Gender-specific association of oxidative stress and immune response in septic shock mortality using NMR-based metabolomics
Source: Royal Society of Chemistry journal article supplement (doi:10.1039/d1mo00398d), 2021-11-15
Supplement: d1mo00398d2.pdf [file d1mo00398d2.pdf]

## **Supporting Information**

### **Gender-Specific Association Of Oxidative Stress And Immune Response In Septic Shock Mortality using NMR based metabolomics**

*Swarnima Pandey<sup>1,2</sup>, Mohd. Adnan Siddiqui<sup>1</sup>, Surendra Kumar*

*Trigun<sup>2</sup>, Afzal Azim<sup>3\*</sup>, and Neeraj Sinha<sup>1\*</sup>*

1 Centre of Biomedical Research, SGPGIMS Campus, Raebareli Road,

Lucknow, 226014, India

2 Department of Zoology, Institute of Science, Banaras Hindu University,

Varanasi- 221005, India

3 Department of Critical Care Medicine, Sanjay Gandhi Postgraduate Institute of

Medical Sciences, Lucknow - 226014, India

\*Author to whom correspondence should be addressed;

Dr. Neeraj Sinha, Centre of Biomedical Research, SGPGIMS Campus, Raebareli Road, Lucknow, India – 226014, Phone: 907-666-6272, neerajcbmr@gmail.com, neeraj.sinha@cbmr.res.in.

Dr. Afzal Azim, Sanjay Gandhi Post Graduate Institute Of Medical Science, Raebareli Road, Lucknow, Uttar Pradesh, India – 226014, Phone: 800-490-4730, draazim2002@gmail.com.

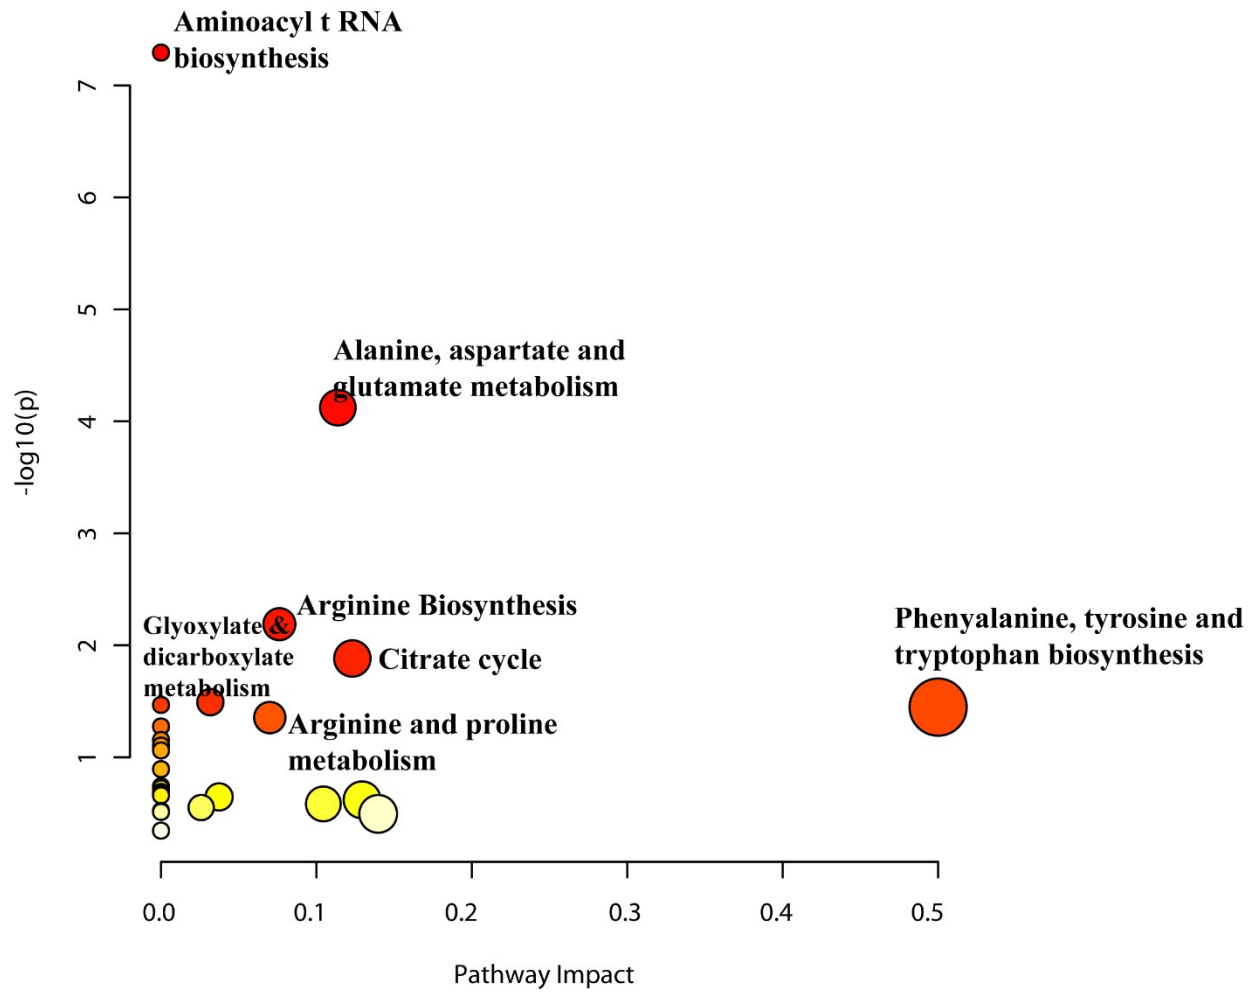

**Figure S11:** Overview of the gender specific metabolic pathway analysis in septic shock patients.

(A)

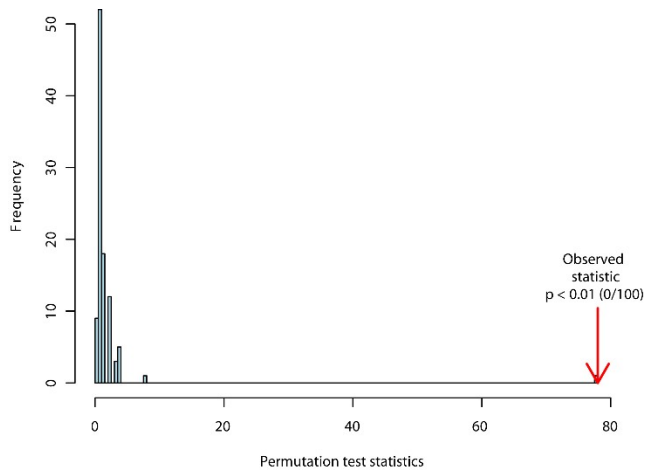

(B)

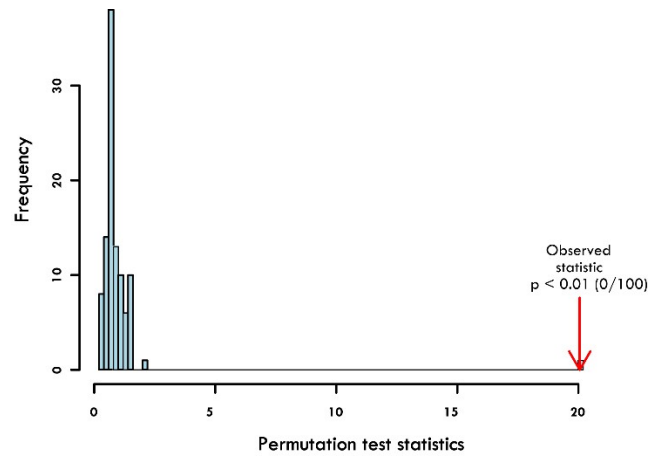

(C)

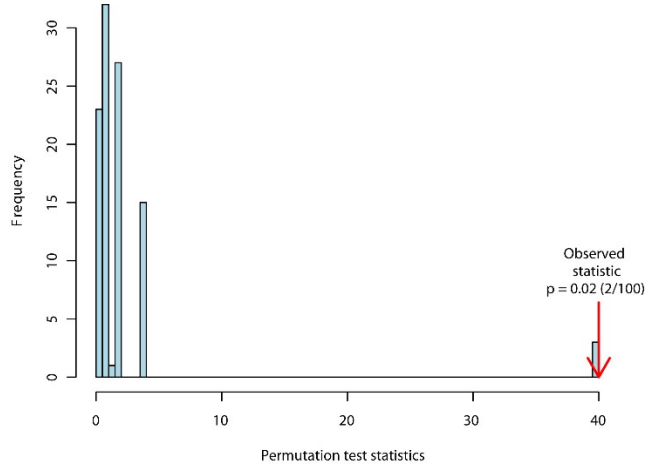

**Figure SI 2:** Permutation test using leave n out for PLS-DA discriminant model between (A) septic shock survivors and non-survivors (B) Female survivors and non-survivors (C) Male survivors and non-survivors
